# Supplementary material
Source: Springer Nature journal article supplement (https://www.springermedizin.de/resource/supplementary/13102_2010_49_MOESM1_ESM.pdf/9667622)

A.

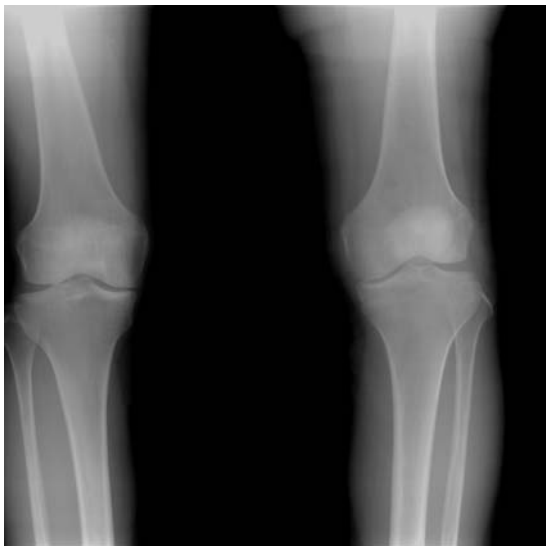

B.

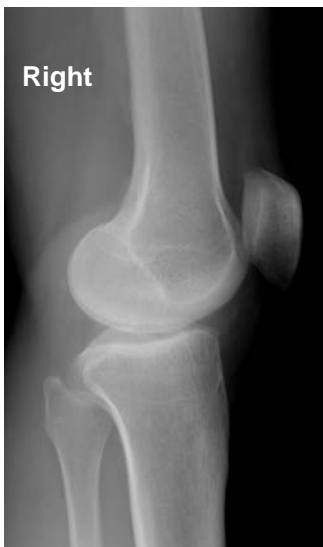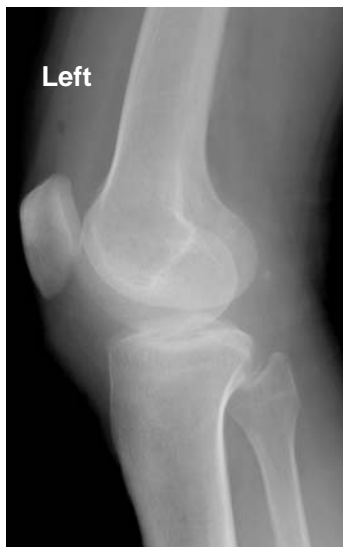

Supplement: MOESM1 [file 9667622]
